# Supplementary material for: Potassium iodide and bis(pyridylcarbamate) electrostatic synergy in the fixation reaction of CO2and epoxides
Source: Royal Society of Chemistry journal article supplement (doi:10.1039/d0nj02597f), 2020-01-01
Supplement: d0nj02597f1.pdf [file d0nj02597f1.pdf]

# Supporting Information

## Potassium iodide and bis(pyridylcarbamate) electrostatic synergy in the fixation reaction of CO<sub>2</sub> and epoxides

Yongjing Hao<sup>a, †</sup>, Tian Tian<sup>a, †</sup>, Yanhui Kang<sup>a</sup>, Tao Chang<sup>a, b, \*</sup>, Xiying Fu<sup>a</sup>, Zheng Zhu<sup>a</sup>, Xiaocai Meng<sup>a</sup>, Balaji Panchal<sup>a</sup>, Shenjun Qin<sup>a, #</sup>

### 1. Experimental section

#### 1.1. Materials and Method

##### 1.1.1 Materials

All starting chemicals and solvents were commercially available and were used without further purification. In this work, CO<sub>2</sub> was supplied by Handan Anke Factory with a purity of 99.99%.

##### 1.1.2 Method

The reactions were carried out in a 100 mL stainless steel autoclave equipped with a magnetic stirrer and automatic temperature control system under atmospheric pressure by purging of CO<sub>2</sub>. Pyridyl isocyanate was in situ generated by heating pyridyl acyl azide, which was obtained by treating the pyridyl acyl chloride with NaN<sub>3</sub>.<sup>1</sup> Elemental analyses were done on a VarioEL instrument from Elementar analysen systeme GmbH. <sup>1</sup>H NMR and <sup>13</sup>C NMR spectra were recorded on a Mercury plus-400 spectrometer using tetramethylsilane (TMS) as an internal standard in DMSO-*d*<sub>6</sub>. Melting points were detected on an X-4 Digital Vision MP Instrument.

##### 1.2. Synthesis of the bis(pyridylcarbamate).

The classic procedure of  $L^1$  was synthesized as follow: 1.58 g (10.68 mmol) of 4-Pyridyl acyl azide in freshly dried 100 mL of toluene was refluxed under a nitrogen atmosphere for 2 h to give a pale yellow solution. Then 0.30mL (5.34 mmol) of ethylene glycol was added in solution and the mixture was refluxed for 0.5 h and then cooled to room temperature. A white powder was collected and washed with toluene, diethyl ether and dried in vacuum. Other products were obtained by a similar method as white powder.

### 1.3. Typical procedure for the carboxylation of epoxides

Propylene oxide (PO, 50mmol) was added into a 100 mL stainless steel autoclave equipped with a magnetic stirrer and automatic temperature control system. The desired amounts of catalysts of bis (pyridylcarbamate) and KI were introduced into the autoclave. After that the sealed container was charged with  $CO_2$  at an appropriate pressure, then the reaction was started at a predetermined temperature. At the end of the reaction, the container was removed, allowed to cool to room temperature and  $CO_2$  unreacted was vented. The product was evaporated to dryness under reduced pressure or recrystallization from ethanol to give the product.

## 2. The data of $L^1$ – $L^5$

Ligand  $L^1$ , yield: 1.42 g (88%). M.p.:191–192°C.  $^1H$  NMR (DMSO- $d_6$ , 400 MHz): 4.39 (s, 4H,CH2); 7.43 (d, 4H,  $J = 5.0$  Hz ,Py-H3); 8.37 (d, 4H,  $J = 5.0$  Hz, Py-H2), 10.22 (s, 2H, NH).  $^{13}C$  NMR (DMSO- $d_6$ , ppm): 153.1, 150.4, 146.0, 112.5, 63.1. Anal. Calcd for  $C_{14}H_{14}N_4O_4$  (302.3): C, 55.63; H, 4.67; N, 18.53; Found: C, 55.71; H, 4.51; N, 18.35.

Ligand  $L^2$ , yield: 93%. M.p.:210–211°C.  $^1H$  NMR (DMSO- $d_6$ , 400 MHz): 3.70 (s, 4H,CH5); 4.25 (s, 4H,CH4); 7.43 (d, 4H,  $J = 4.6$  Hz, Py-H3), 8.36 (d, 4H,  $J = 4.6$  Hz, Py-H2), 10.23 (s, 2H, NH).  $^{13}C$  NMR (DMSO- $d_6$ , ppm): 153.6, 150.7, 146.5, 112.8, 68.9,64.4. Anal. Calcd for  $C_{16}H_{18}N_4O_5$  (346.34): C, 55.49; H, 5.24; N, 16.18 %; Found: C, 55.35; H, 5.31; N, 16.20 %.

Ligand  $L^3$ , yield: 76.3%, M.p.: 237–238 °C.  $^1\text{H}$  NMR (DMSO- $d_6$ , 400 MHz, ppm): 3.59 (s, 4H, CH7); 3.66 (d, 4H,  $J = 4.6$  Hz, CH6); 4.22 (t, 4H,  $J = 4.4$  Hz, CH5); 7.41 (d, 4H,  $J_1 = 6.4$  Hz, Py-H3); 8.36 (d, 4H,  $J = 6.3$  Hz, Py-H2); 10.21 (s, 2H, NH).  $^{13}\text{C}$  NMR (DMSO- $d_6$ , ppm):  $\delta = 64.5, 69.0, 70.2, 112.8, 146.5, 150.7, 153.6$ . Anal. Calcd for  $\text{C}_{18}\text{H}_{22}\text{N}_4\text{O}_6$  (390.4): C, 55.38; H, 5.68; N, 14.35 %. Found: C, 55.29; H, 5.56; N, 14.11 %.

Ligand  $L^4$ , yield: 57.3%, M.p.: 166–167 °C.  $^1\text{H}$  NMR (DMSO- $d_6$ , 400 MHz, ppm): 3.53 (s, 8H, CH7,CH8); 3.64 (t, 4H,  $J = 4.4$  Hz, CH6); 4.22 (t, 4H,  $J = 4.2$  Hz, CH5); 7.43 (d, 4H,  $J_1 = 6.12$  Hz, Py-H3); 8.36 (d, 2H,  $J = 6.08$  Hz, Py-H2); 10.24 (s, 2H, NH).  $^{13}\text{C}$  NMR (DMSO- $d_6$ , ppm):  $\delta = 64.5, 68.9, 70.2, 70.3, 112.7, 146.5, 150.7, 153.6$ . Anal. Calcd for  $\text{C}_{20}\text{H}_{26}\text{N}_4\text{O}_7$  (434.4): C, 55.29; H, 6.03; N, 12.90 %. Found: C, 55.25; H, 5.91; N, 13.08 %.

Ligand  $L^5$ , yield: 54.2%, M.p.: 86–87 °C.  $^1\text{H}$  NMR (DMSO- $d_6$ , 400 MHz, ppm): 3.52 (s, 8H, CH<sub>2</sub>); 3.62 (t, 4H,  $J = 4.4$  Hz, CH<sub>2</sub>); 4.19 (t, 4H,  $J = 4.4$  Hz, CH<sub>2</sub>); 7.28 (dd, 2H,  $J_1 = 4.8$  Hz,  $J_2 = 8.0$  Hz, Py-H5); 7.86 (d, 2H,  $J = 8.0$  Hz, Py-H4); 8.17 (d, 2H,  $J = 4.4$  Hz, Py-H6); 8.61 (s, 2H, Py-H2); 9.90 (s, 2H, NH).  $^{13}\text{C}$  NMR (DMSO- $d_6$ , ppm):  $\delta = 63.8, 68.5, 69.67, 69.71, 123.5, 124.9, 135.8, 140.1, 143.4, 153.5$ . Anal. Calcd for  $\text{C}_{20}\text{H}_{26}\text{N}_4\text{O}_7$  (434.4): C, 55.29; H, 6.03; N, 12.90 %. Found: C, 55.23; H, 5.86; N, 13.11 %

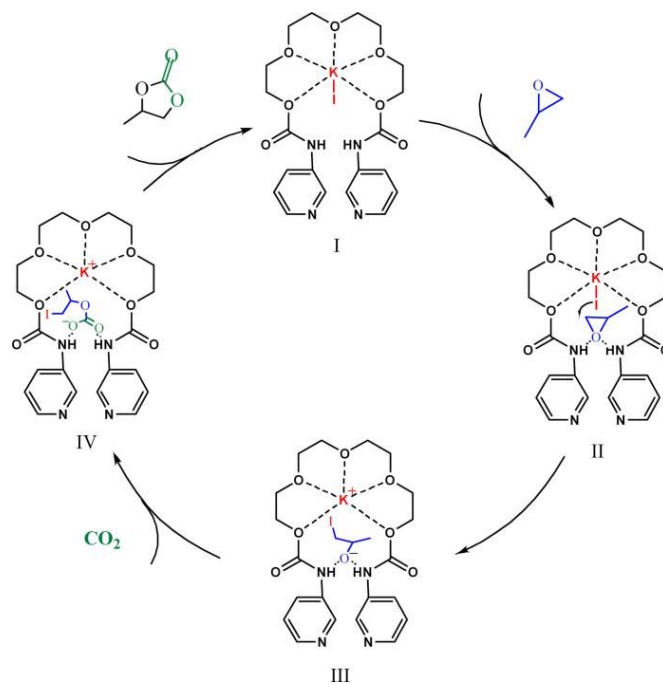

Scheme S1. Possible Mechanistic Pathway

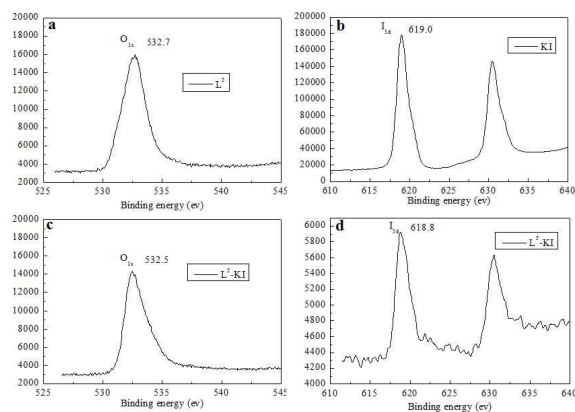

Fig. S1. Interaction of L<sup>5</sup> with KI identified by XPS

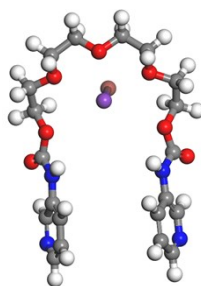

Fig. S2. Optimized structure of L<sup>5</sup> combined with KI

## Notes and references

- 1 T. Werner and N. Tenhumberg, *J. CO<sub>2</sub> Util.*, 2014, **7**, 39.
